# Supplementary material for: Integrative Analysis of Low- and High-Resolution eQTL
Source: PubMed Central journal article supplement (PMC2978079; doi:10.1371/journal.pone.0013920), 2010-11-10

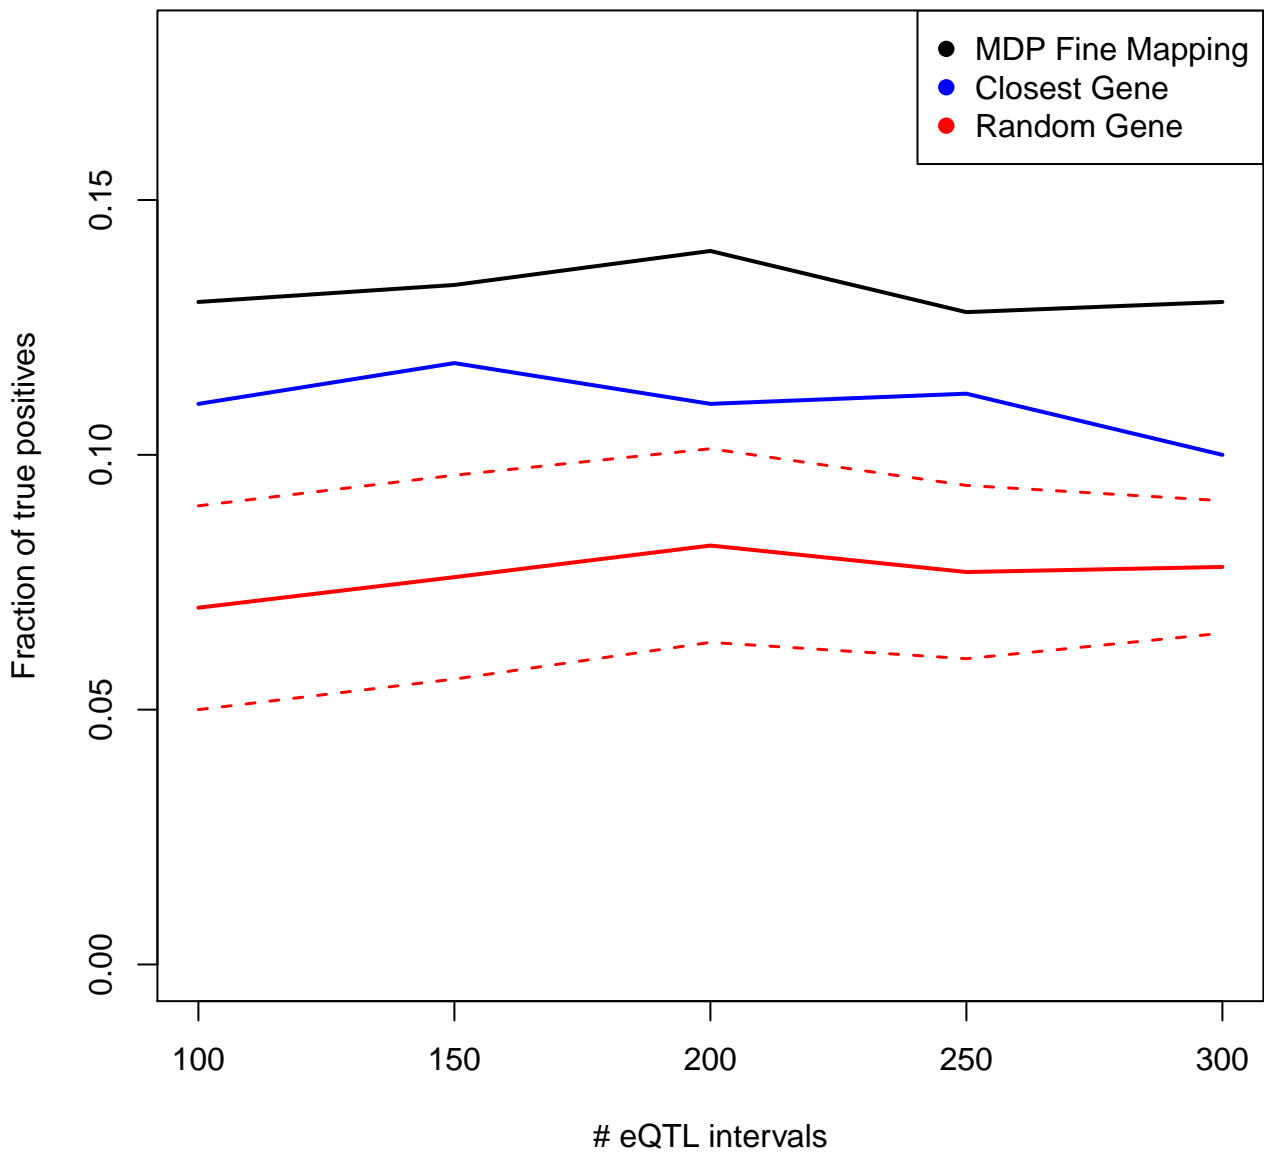

Supplement: pone.0013920.s003.pdf [file pone.0013920.s003.pdf]
