# Supplementary material for: Integrative Analysis of Low- and High-Resolution eQTL
Source: PubMed Central journal article supplement (PMC2978079; doi:10.1371/journal.pone.0013920), 2010-11-10
Supplement: pone.0013920.s007.pdf [file pone.0013920.s007.pdf]

# Amino-acid synthetases

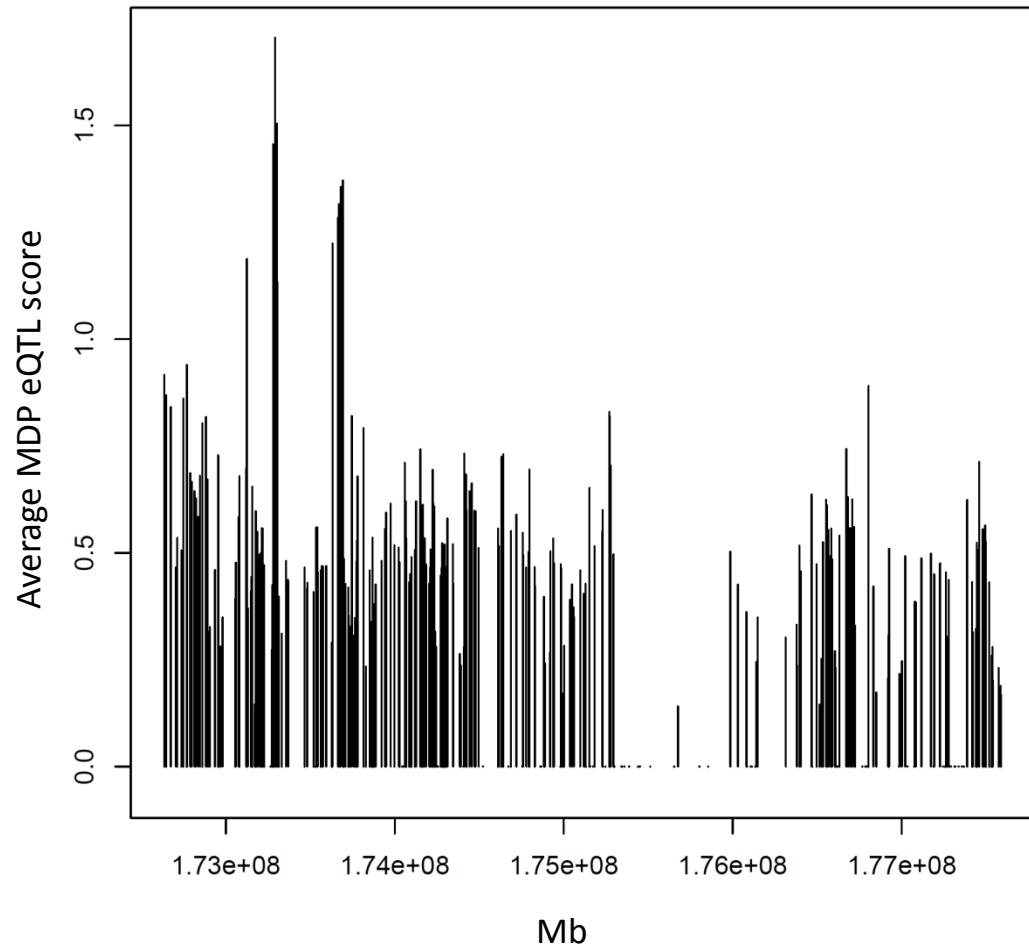

Significant in BXD: 7 genes

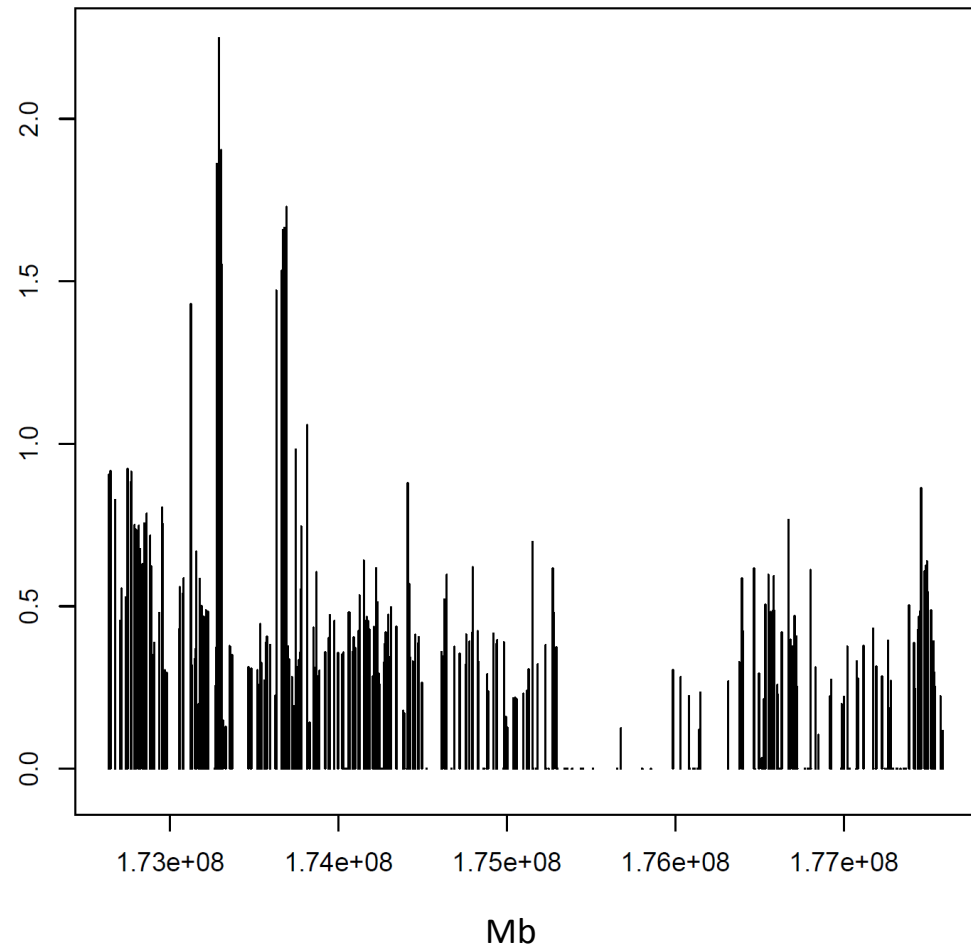

Significant in BXD and MDP: 5 genes

# Amino-acid transporter

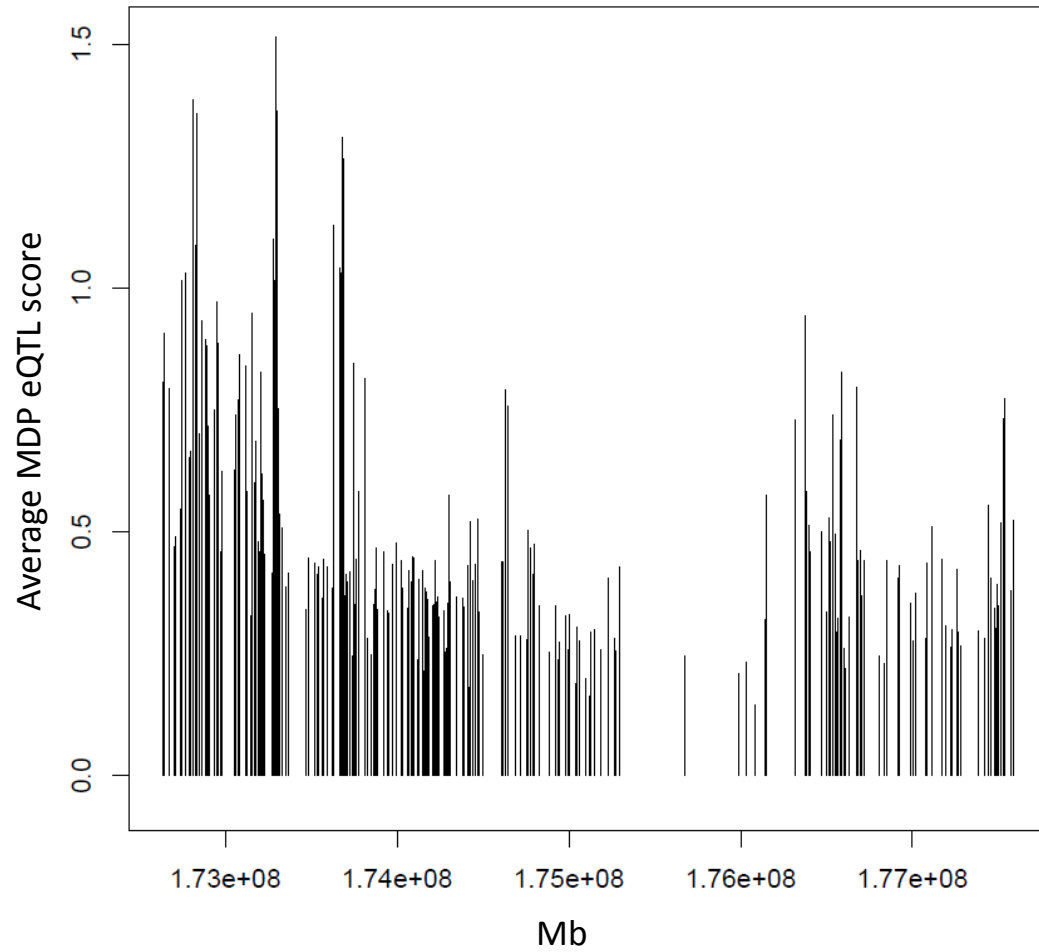

Significant in BXD: 4 genes

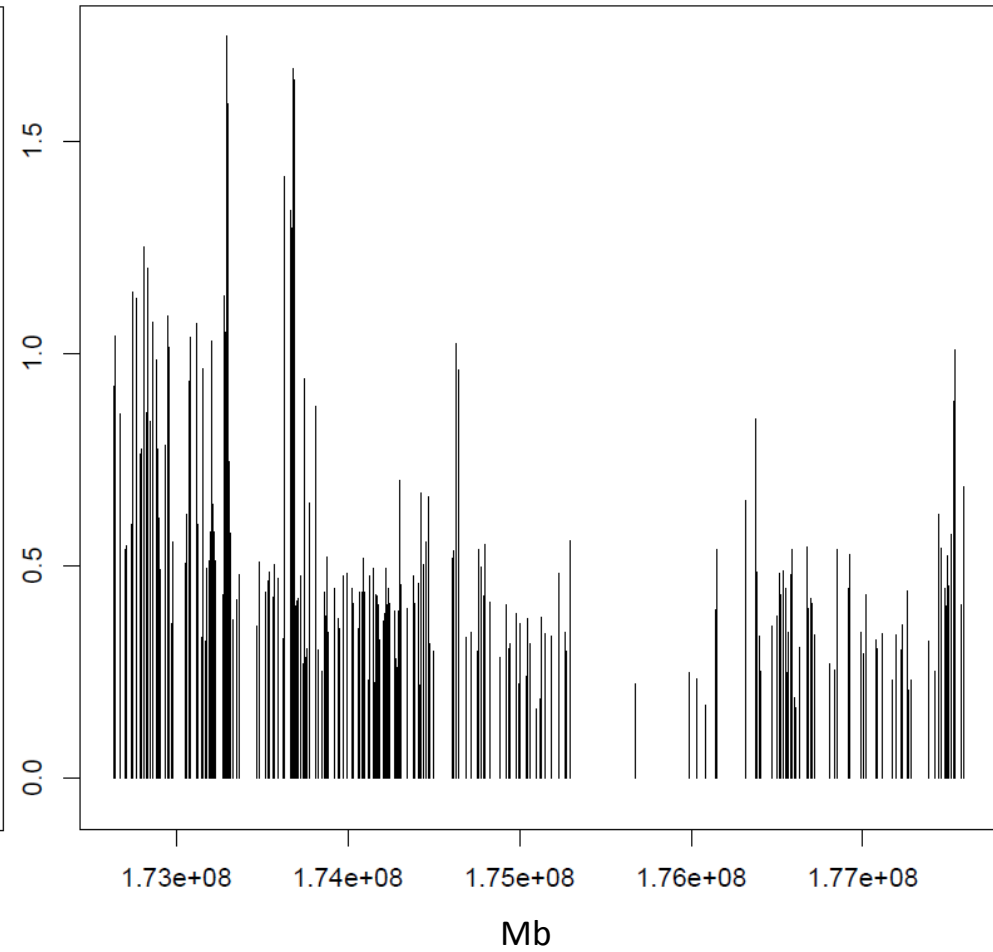

Significant in BXD and MDP: 3 genes

# Amino-acid biosynthesis

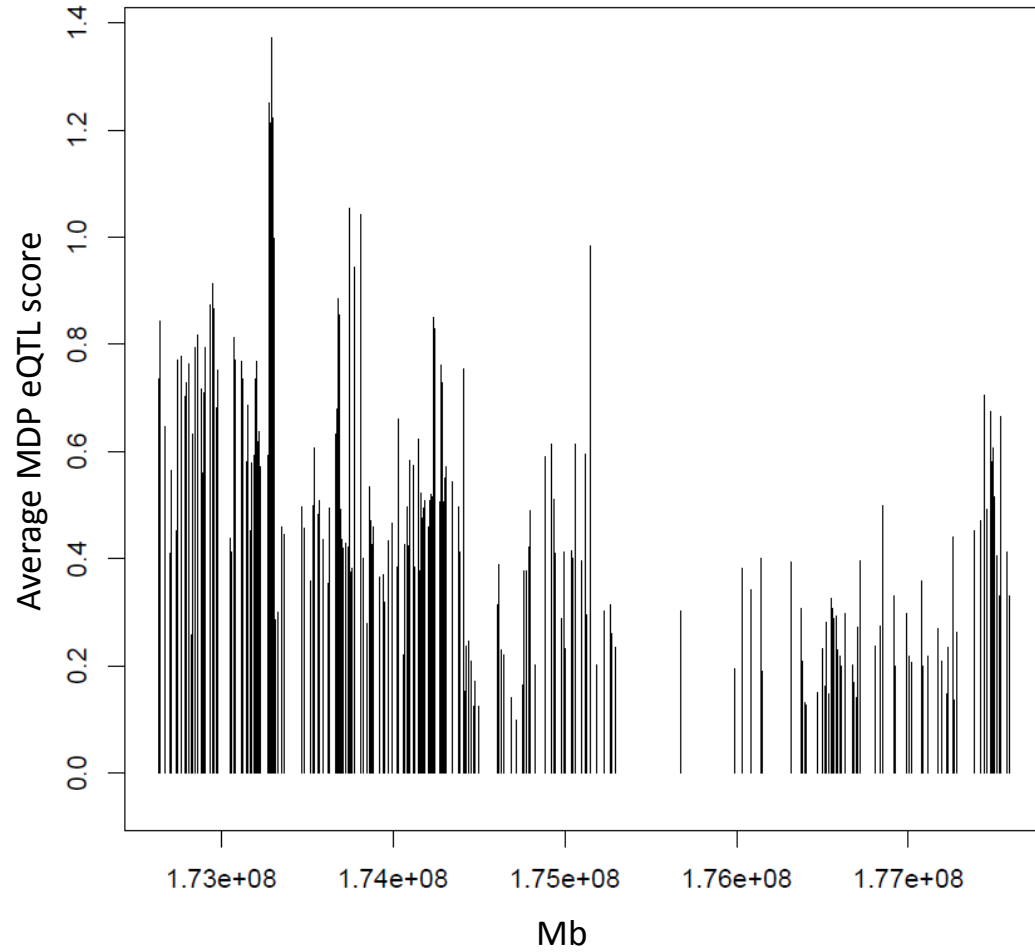

Significant in BXD: 3 genes

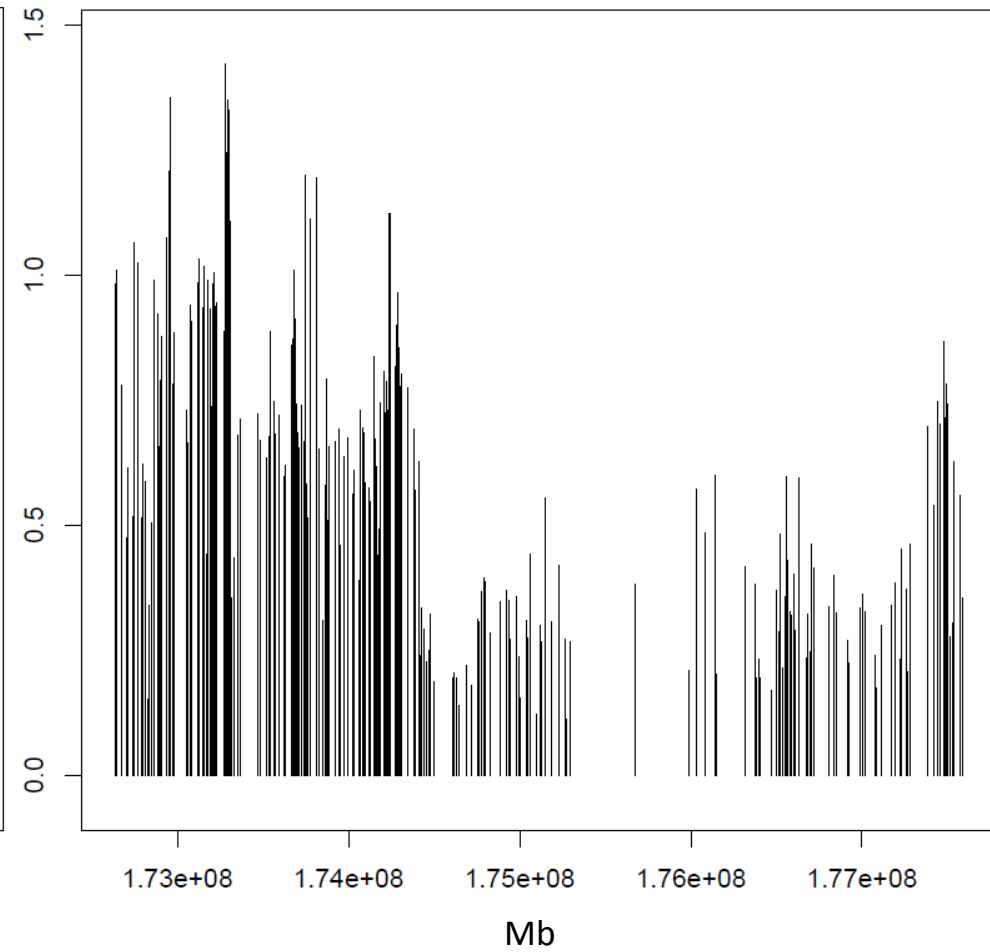

Significant in BXD and MDP: 2 genes

# Mitochondrion

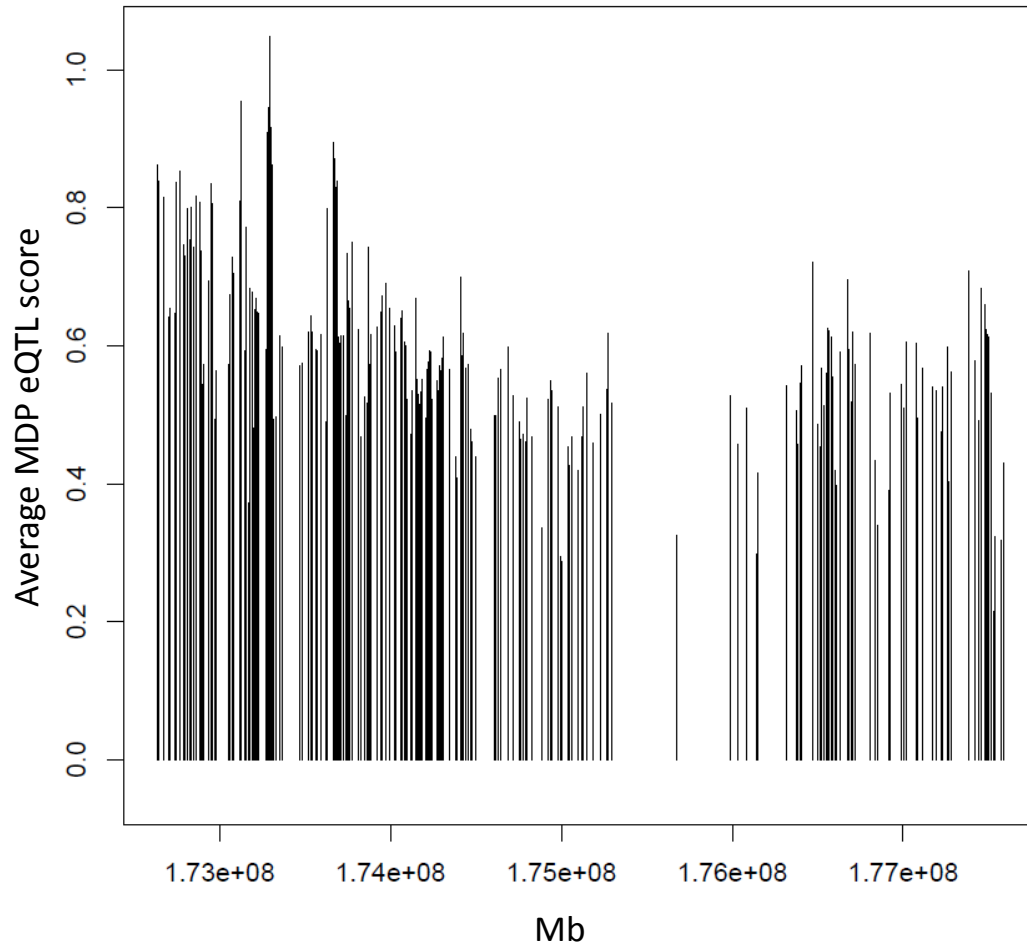

Significant in BXD: 26 genes

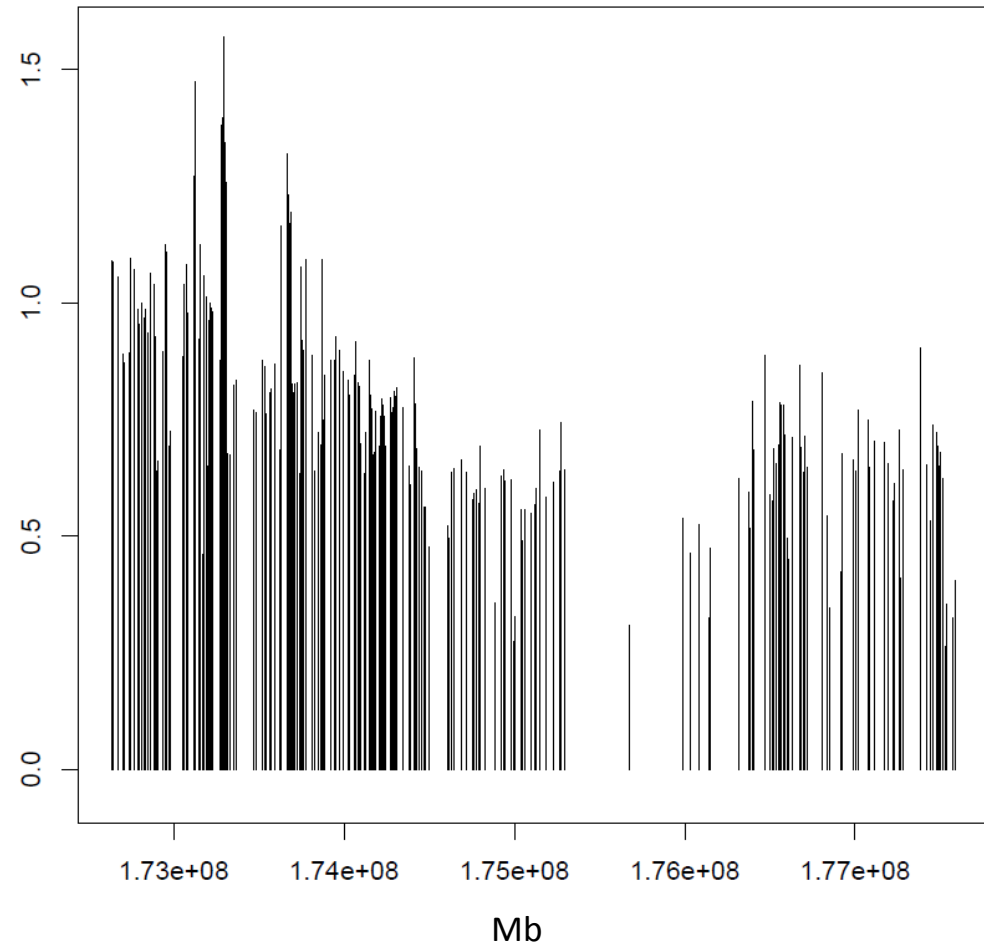

Significant in BXD and MDP: 11 genes

# Transit Peptide

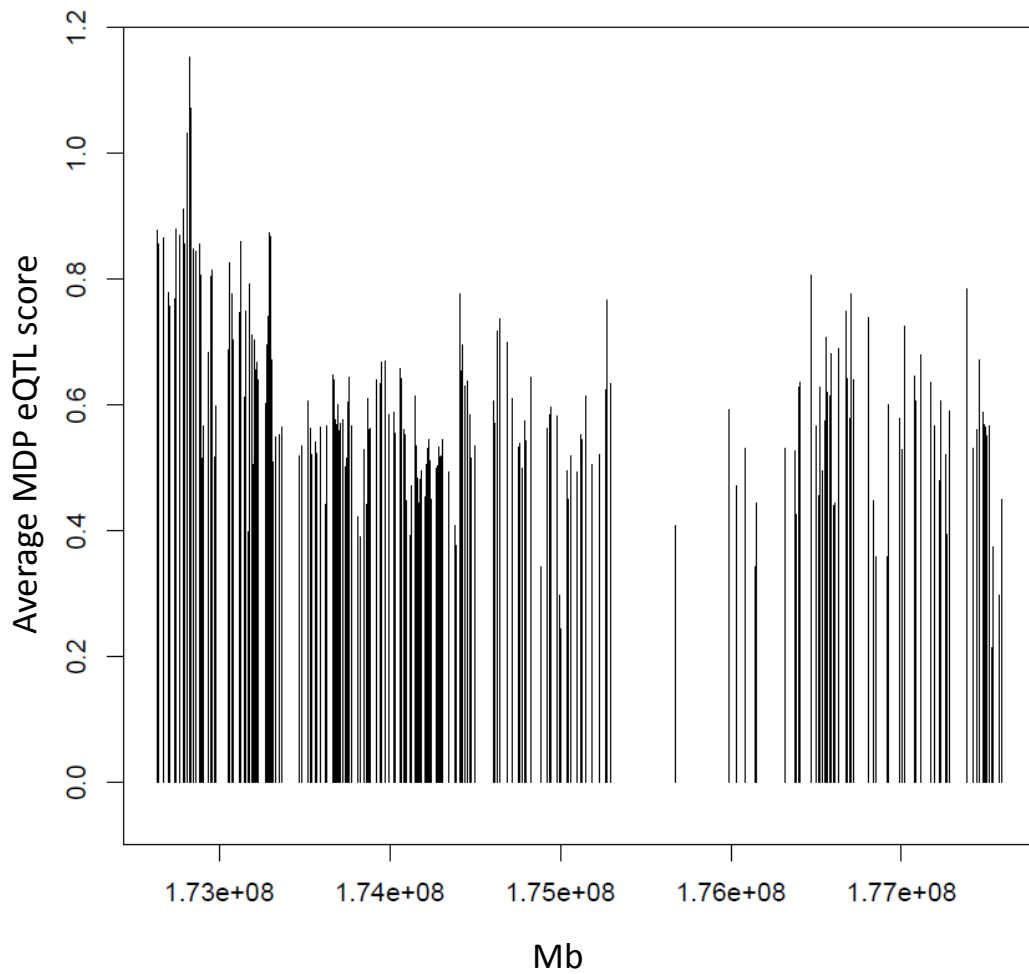

Significant in BXD: 10 genes

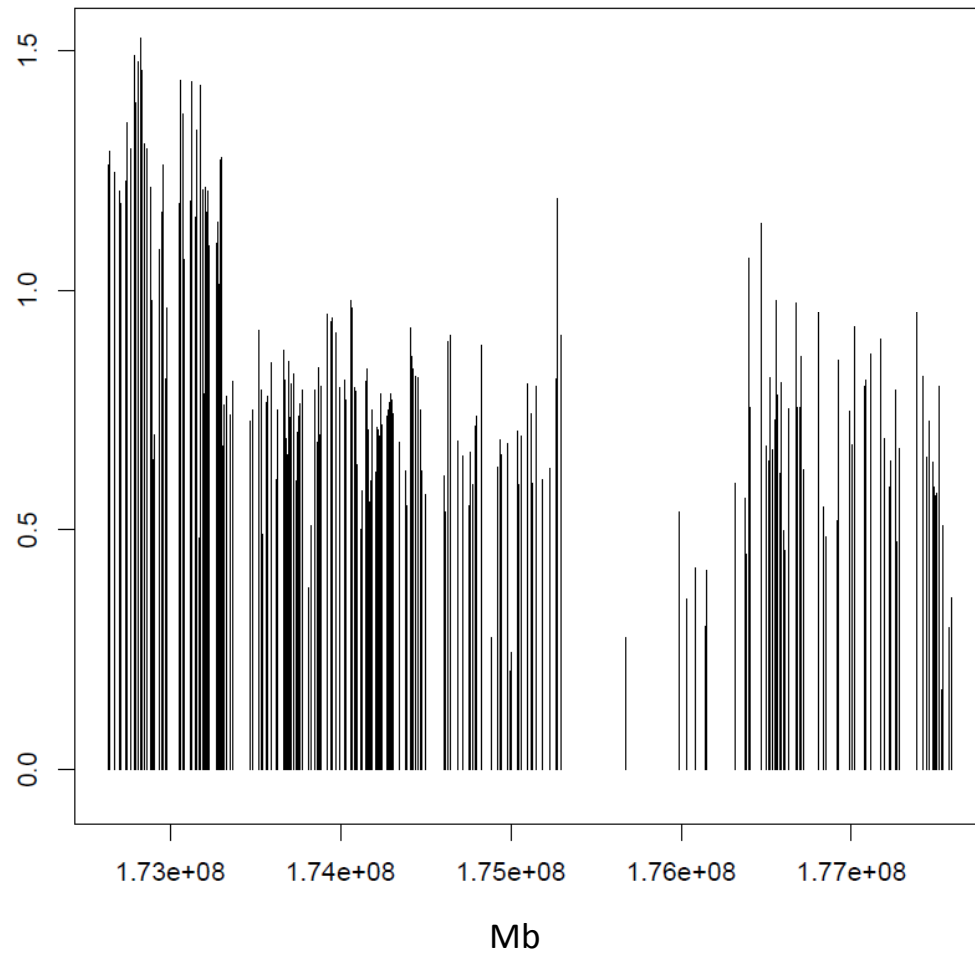

Significant in BXD and MDP: 5 genes

# Potassium Ion Transport

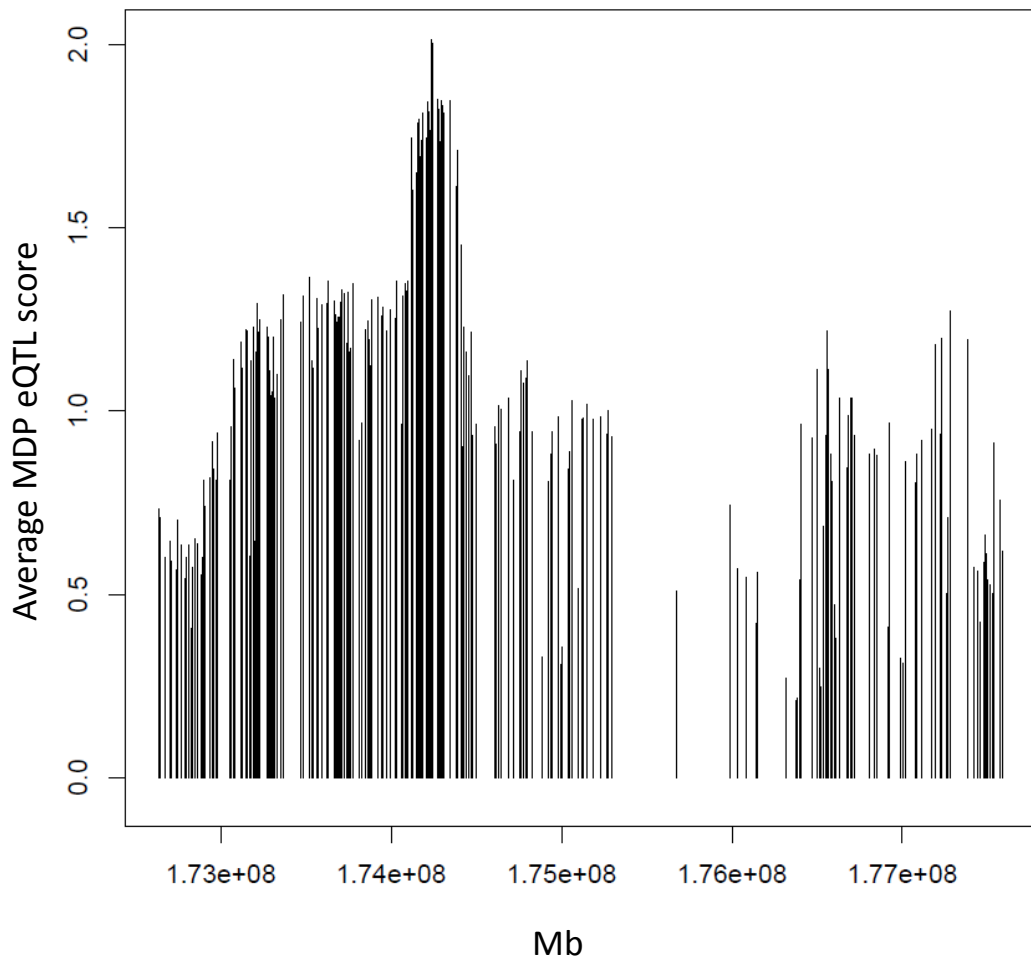

Significant in BXD: 4 genes

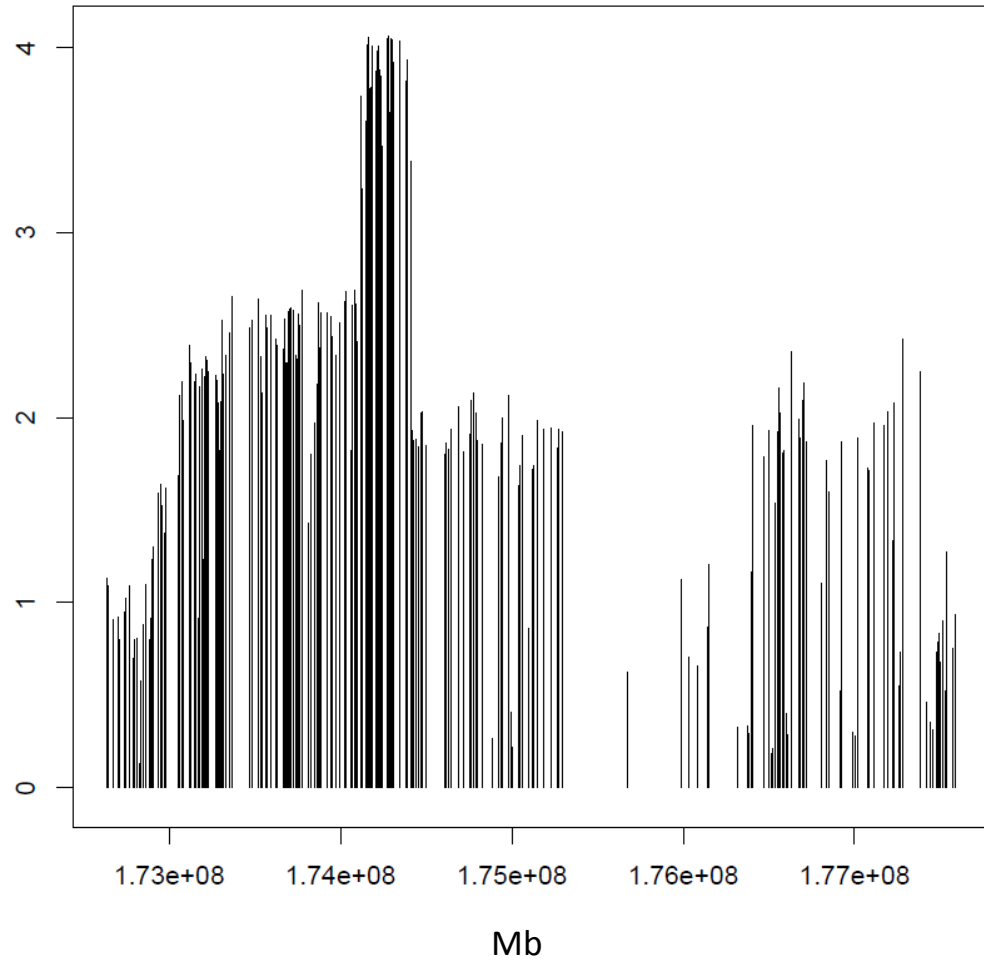

Significant in BXD and MDP: 2 genes

# Neuron Projection

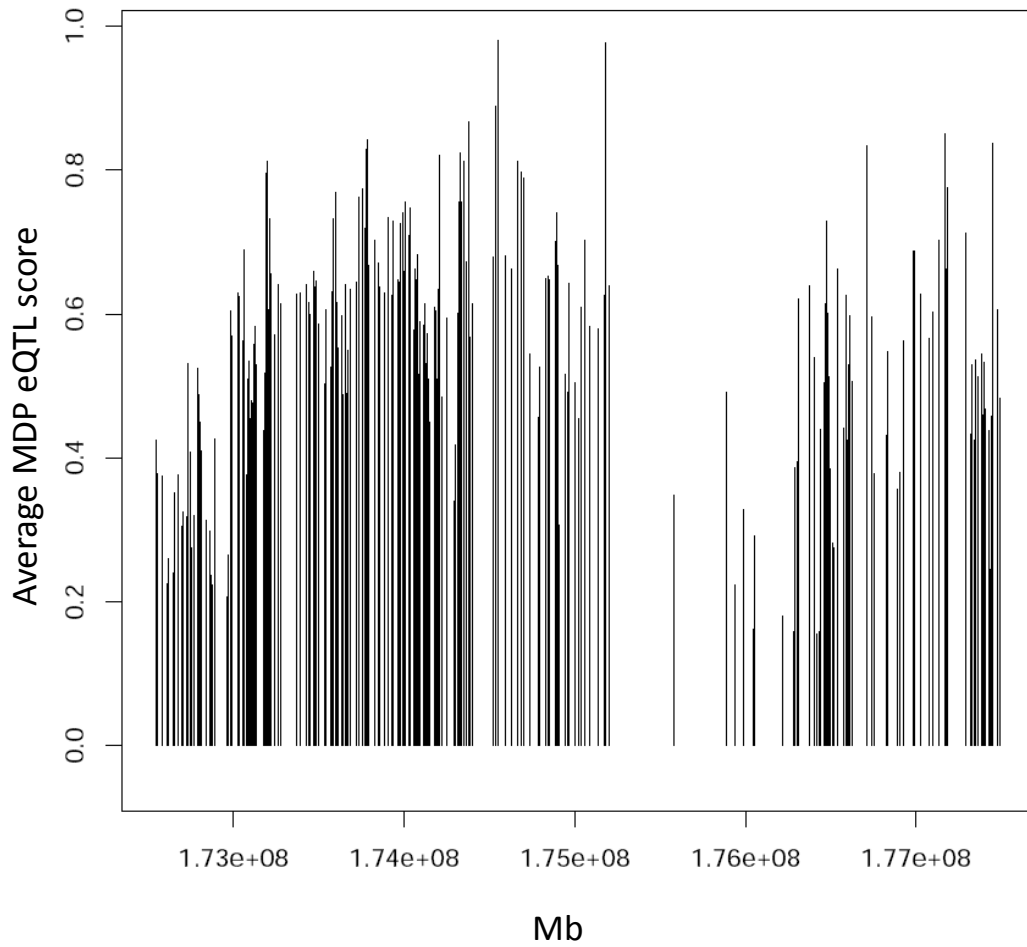

Significant in BXD: 5 genes

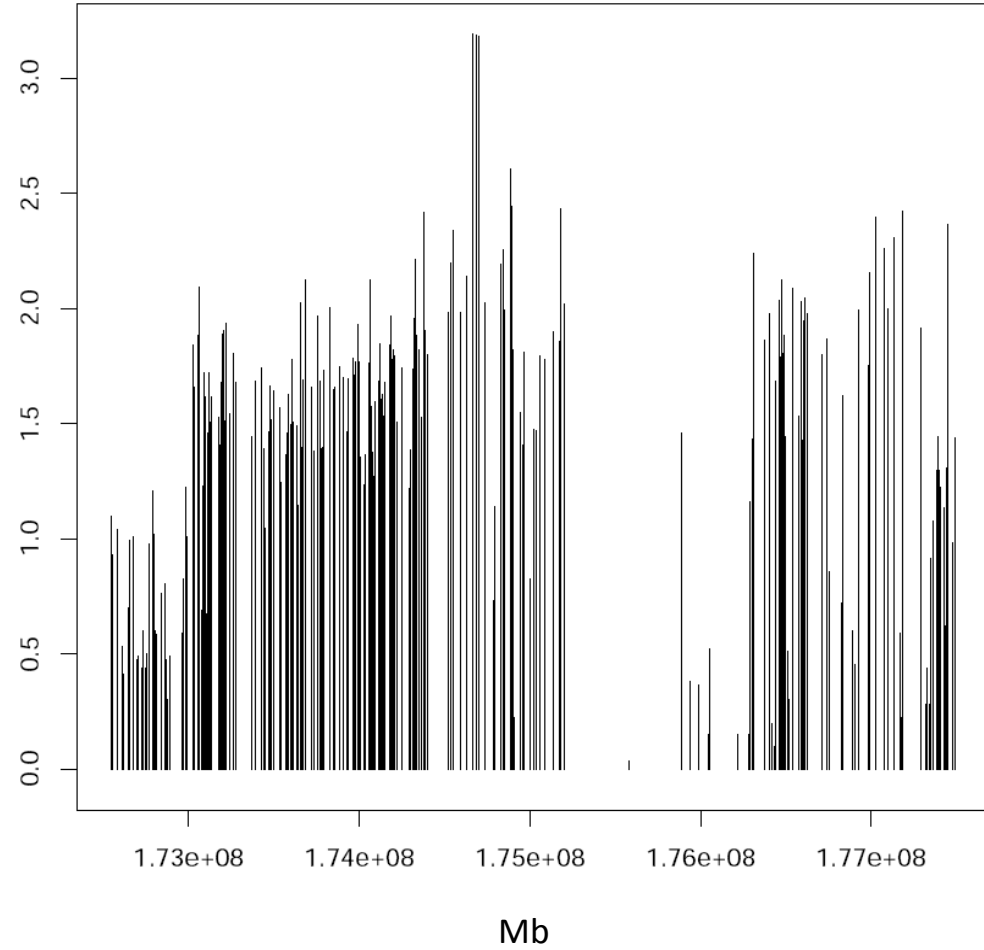

Significant in BXD and MDP: 2 genes

# RAB Proteins

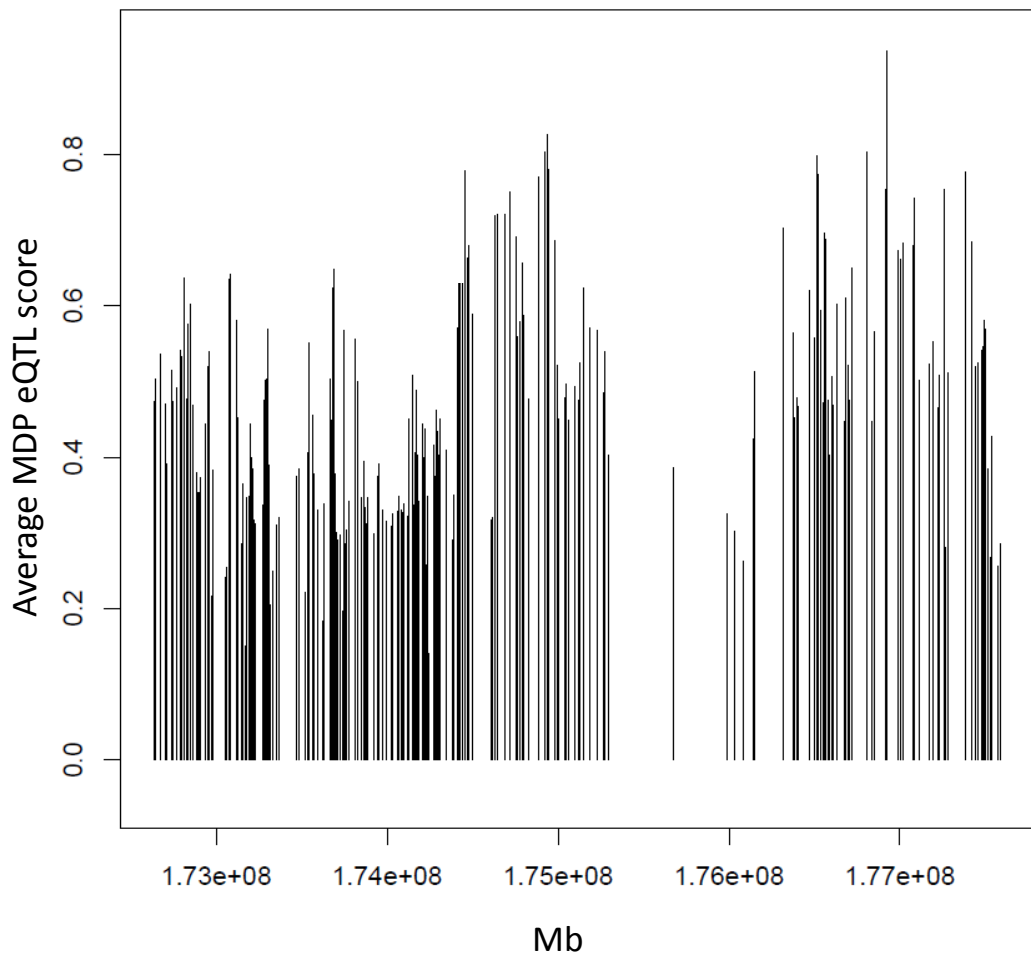

Significant in BXD: 3 genes

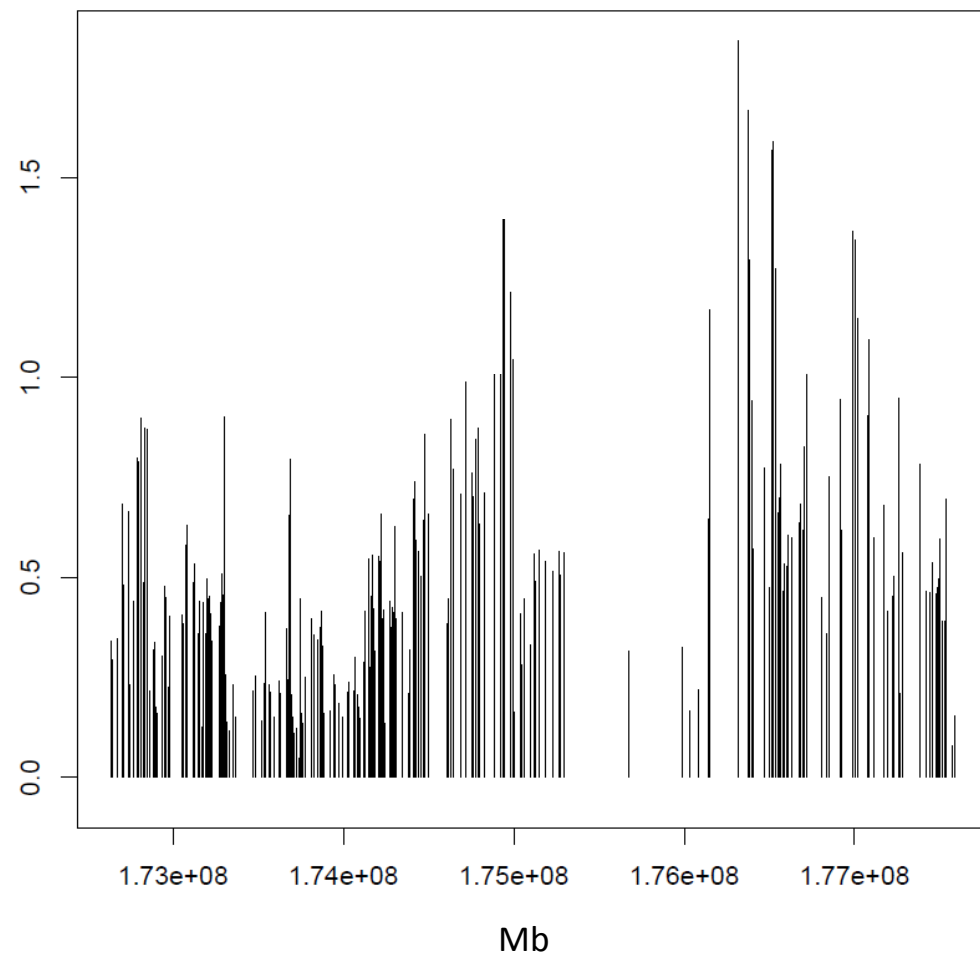

Significant in BXD and MDP: 2 genes



# WD40 repeat proteins

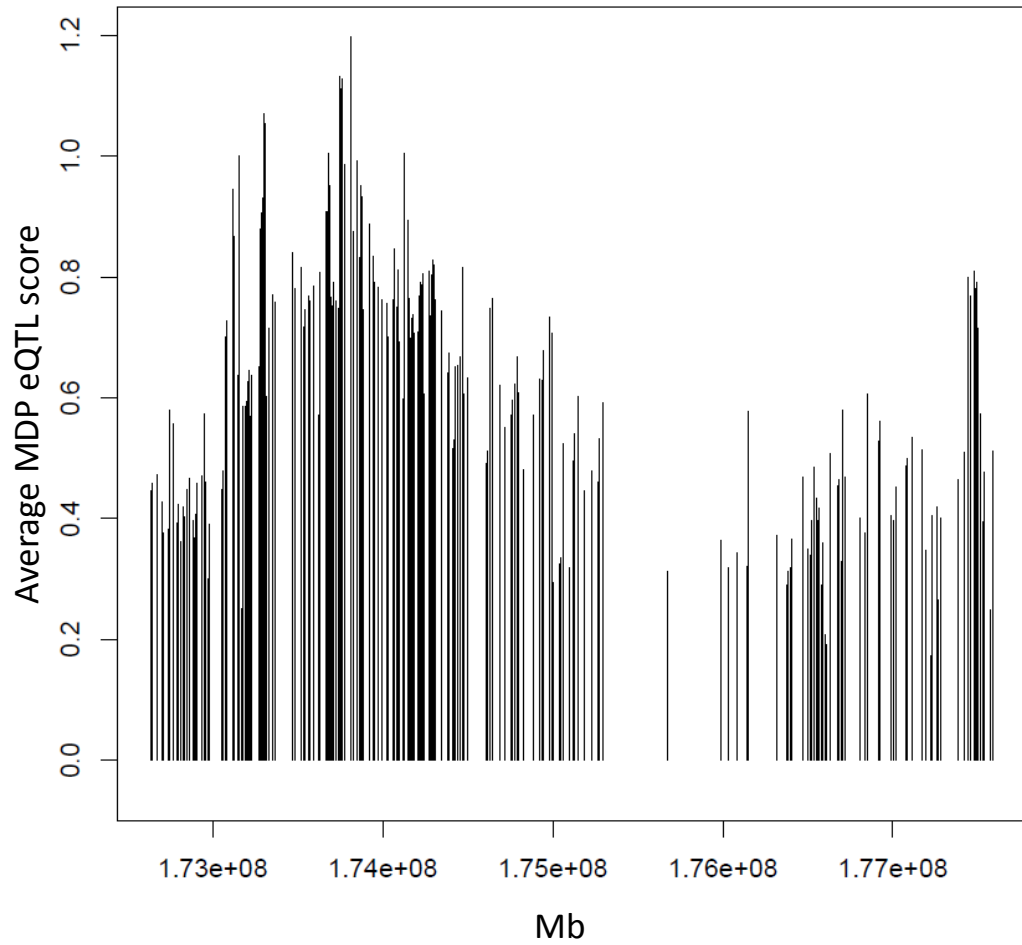

Significant in BXD: 7 genes

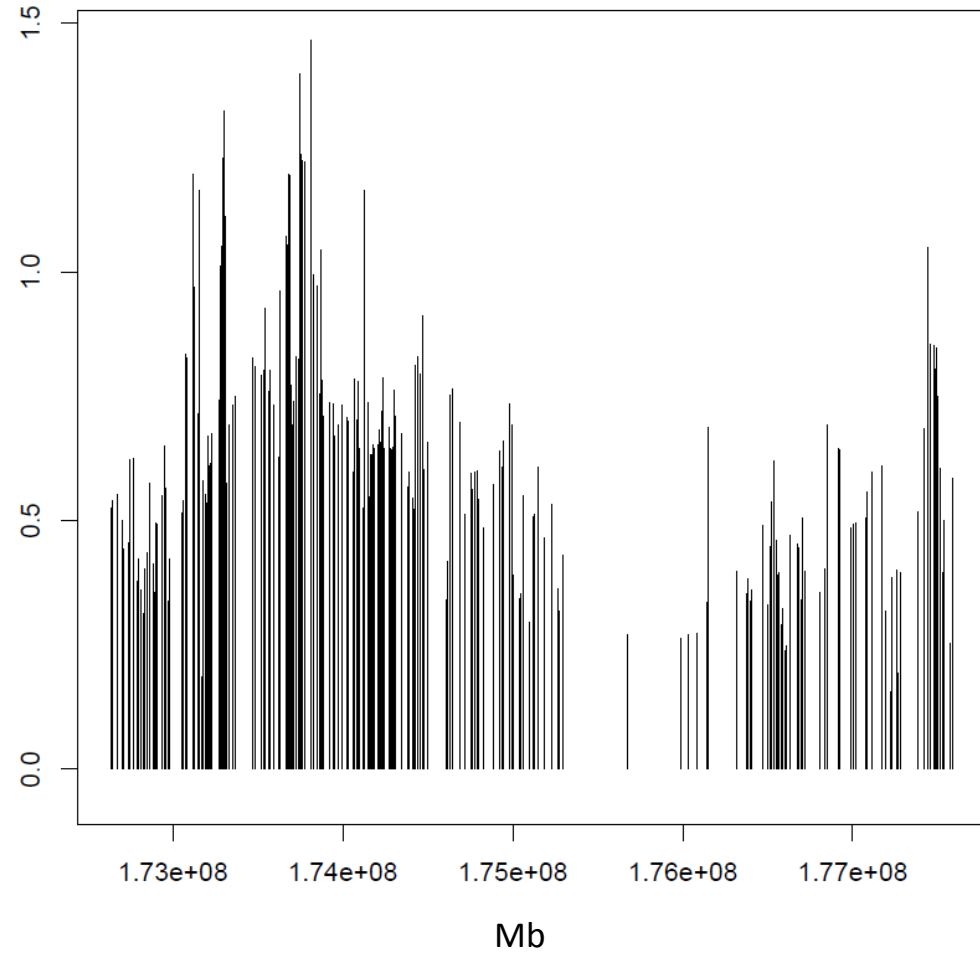

Significant in BXD and MDP: 4 genes
